# Supplementary material for: A Systematic Review and Meta-Analysis of Associated Factors of Gender-Based Violence against Women in Sub-Saharan Africa
Source: MDPI journal article supplement (doi:10.3390/ijerph18094407), 2021-04-21
Supplement: s1 [file s1]

Table S1. Appraisal of Quantitative Studies

[illegible]

[illegible]

|                         |     |     |     |     |     |     |     |     |     |       |      |
|-------------------------|-----|-----|-----|-----|-----|-----|-----|-----|-----|-------|------|
| Hendricks et al. (2018) | Yes | Clear | High |
|-------------------------|-----|-----|-----|-----|-----|-----|-----|-----|-----|-------|------|

#### CASP Key Questions

1. Did the study address a clearly focused issue?
2. Was the participants of the study recruited in an acceptable way?
3. Was the outcome accurately measured to minimise bias?
4. Was the sampling appropriate for the study
5. What are the results of the study?
6. How precise the tools used to measure the results?
7. Do you believe the results?
8. Can the results be applied to the local population?
9. Do the results of the study fit with other available evidence?
10. What are the implications of this study for practice?

Supplementary files: Meta-analysis: Test of Publication Bias using Funnel Plot and Eggers Test

*A. Education focused studies*

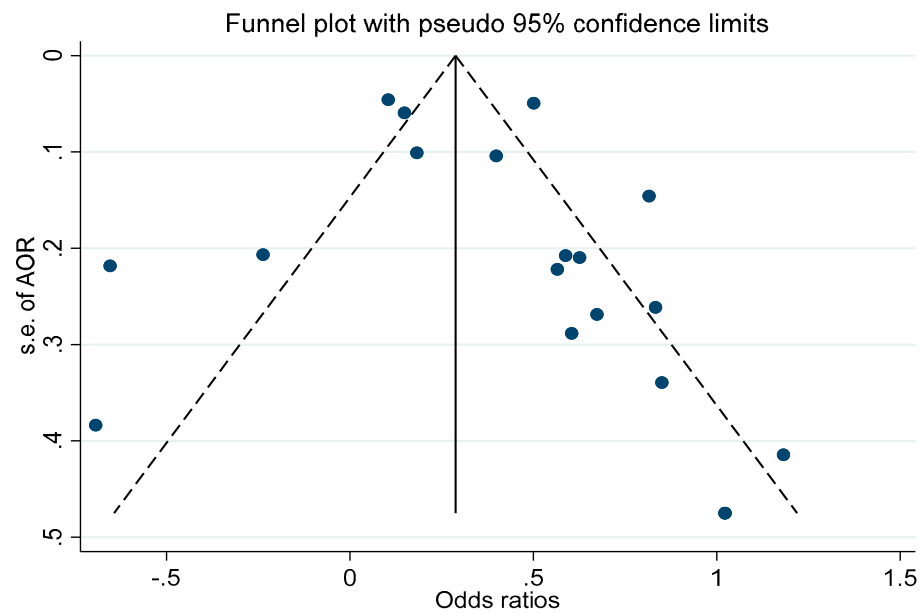

Figure S2. Funnel plot for studies focused on education and GBV

Tests for Publication Bias for partner and women education

| Education | n  | Egger's |       |
|-----------|----|---------|-------|
|           |    | Bias    | P     |
| Partner   | 8  | 0.97    | 0.492 |
| Women     | 11 | 0.92    | 0.434 |
| overall   | 19 | 0.94    | 0.273 |

## B. Alcohol consumption focused studies

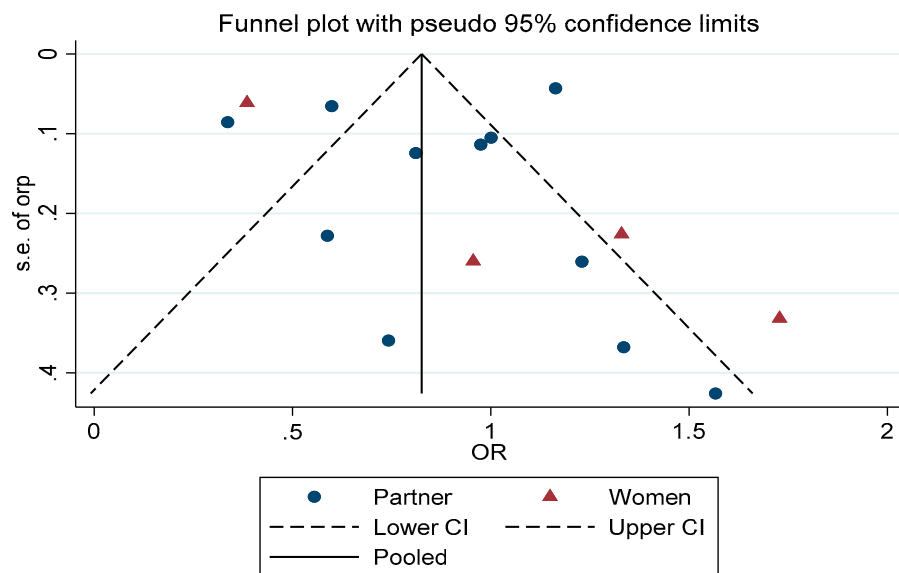

Figure S3: Funnel plot for studies on alcohol consumption and GBV

Tests for Publication bias for partner and women alcohol consumption

| Education | n  | Egger's |       |
|-----------|----|---------|-------|
|           |    | Bias    | P     |
| Partner   | 11 | 0.65    | 0.71  |
| Women     | 4  | 4.5     | 0.038 |

## C. Substance use focused studies

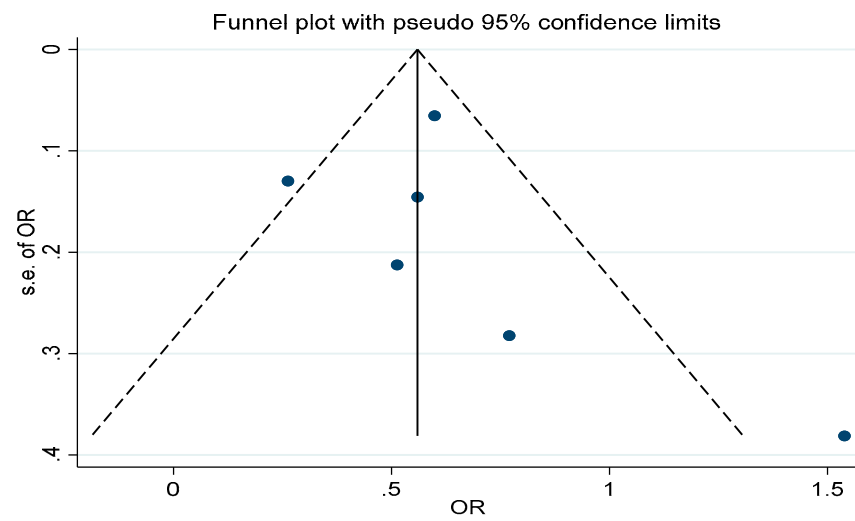

Figure S4: Funnel plot for studies focused on substance use and GBV

D. Decision- making skills focused studies

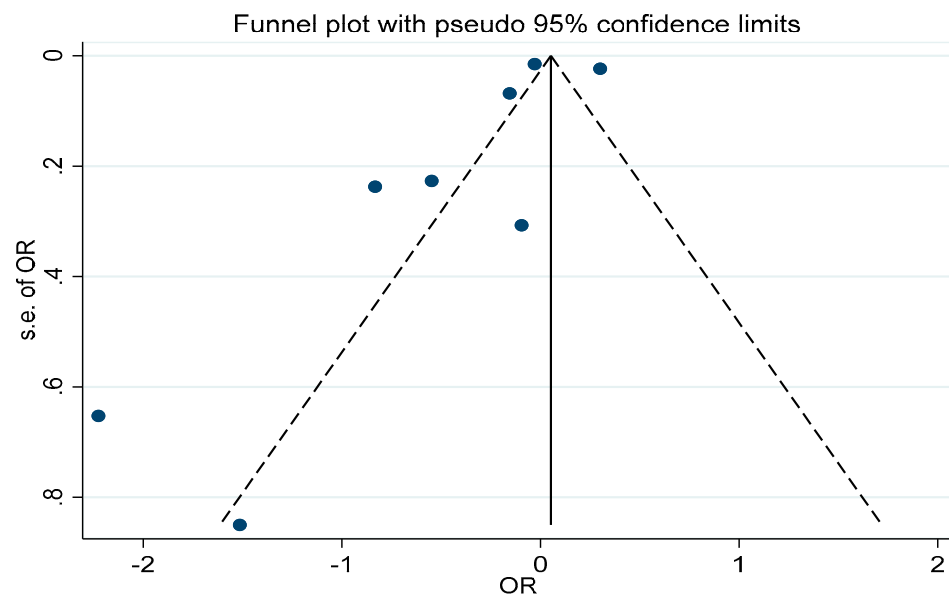

Figure S5. Funnel plot for studies on decision-making skills and GBV

E. Tolerant attitude focused studies

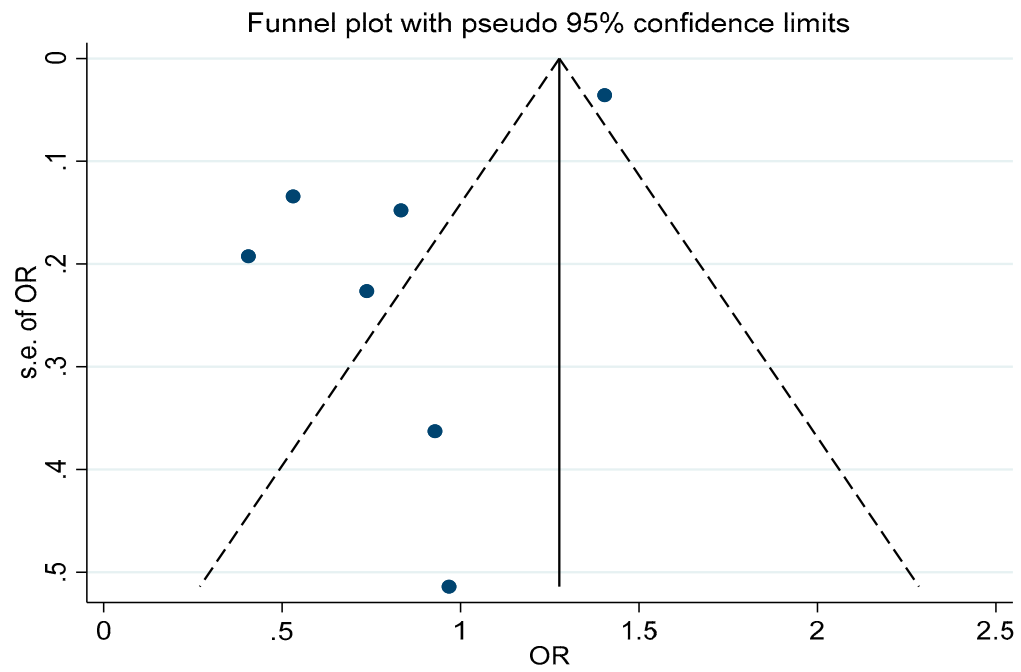

Figure S6. Funnel plot for studies on tolerant attitudes and GBV

F. History of child abuse focused studies



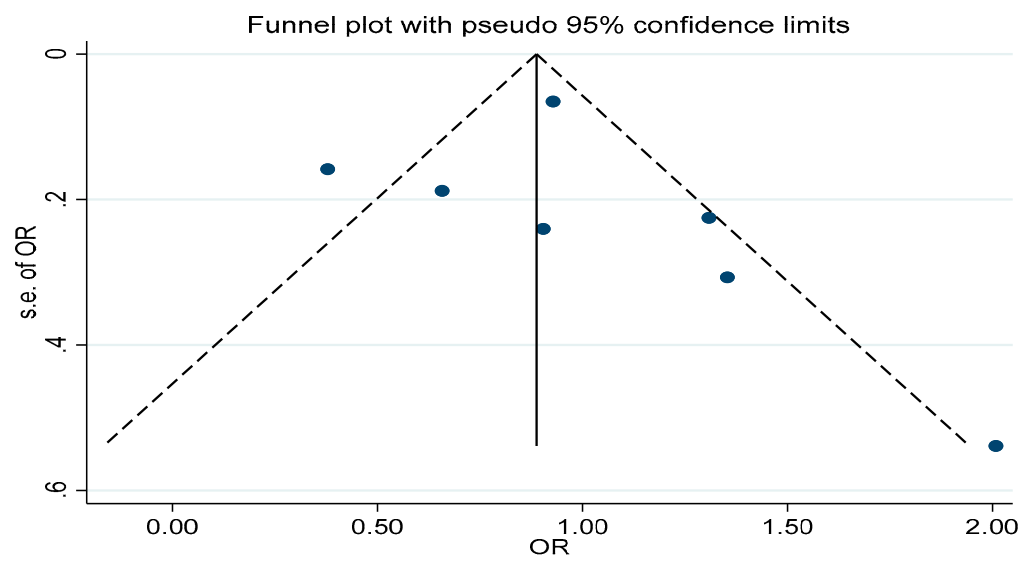

Figure S7. Funnel plot for studies on history of child abuse and GBV

G. History of beating focused studies

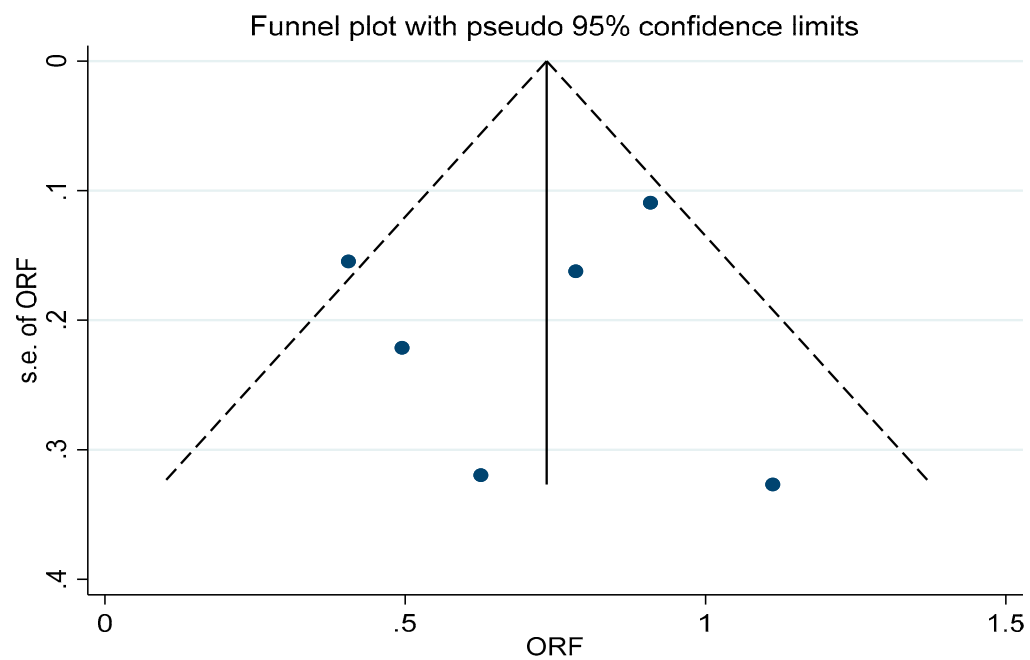

Figure S8. Funnel plot for studies on family history of abuse and GBV
